# Supplementary material
Source: PubMed Central journal article supplement (PMC4382040)
Supplement: supp_3.1.E97_2014-0025-appendix_1.pdf [file supp_3.1.E97_2014-0025-appendix_1.pdf]

## Appendix 1 (as supplied by authors): Questions used from each of the 1244 series forms

### Intake Health Status Assessment: Section I

---

Current Medical Health

---

Draining Wound  No  Yes

Current Smoker  No  Yes

If yes, Discussed smoking  
ban and cessation option:

---

Alerts

---

Prosthesis Required  No  Yes

Pregnant  No  Yes

If yes, Due Date:

---

### Intake Health Status Assessment: Section II

---

Anthropometrics and Current Vital Signs

---

Height: (m) Weight: (kg)

---

Cancer History

---

Have you ever had cancer?  No  Yes

If yes, specify:

---

Central Nervous System

---

Do you have or have ever had problems with:

Head Injury (specify):

Seizure Activity (specify):

Spinal Cord Injury (specify):

---

Cardiovascular System

---

Do you have or have ever had problems with:

High Blood Pressure (specify):

Heart Attack (specify):

Elevated Cholesterol (specify):

Angina (specify):

Stroke (specify):

Other: Arrhythmia

---

Otolaryngeal System, Respiratory System and Eyes

---

Do you have or have ever had problems with:

Asthma (specify):

Chronic Bronchitis (specify):

Chronic Obstructive Pulmonary Disease (specify):

---

---

Gastro Intestinal

---

A) Stomach/Oesophagus

Do you have or have ever had problems with:

Ulcers (specify):

---

Urinary/Reproductive Systems

A) Male Health Issues

Prostate Problems?  No  Yes

If yes, specify:

B) Female Health Issues

Previous Reproductive Problems

Cervical/Uterine/Ovarian Cancer

---

Endocrine System

---

Do you have or have ever had problems with:

Diabetes (specify):

---

Musculoskeletal System

---

Do you have or have ever had problems with:

Difficulty Walking (specify):

Arthritis/Rheumatism (specify):

Osteoporosis (specify):

Back Pain (specify):

---

Blood/Immune Systems

---

Do you have or have ever had problems with:

Hodgkin's Disease (specify):

Leukemia (specify):

---

**Intake Health Status Assessment: Infectious Disease Screening (1244-ID)**

---

Screening History

---

|                          |             | Outcome                  |                          |
|--------------------------|-------------|--------------------------|--------------------------|
|                          |             | Positive                 | Negative                 |
| <input type="checkbox"/> | HIV/AIDS    | <input type="checkbox"/> | <input type="checkbox"/> |
| <input type="checkbox"/> | Hepatitis C | <input type="checkbox"/> | <input type="checkbox"/> |

---

Lifestyle

---

| Yes                      | No                       | Unknown                  |                                                    |
|--------------------------|--------------------------|--------------------------|----------------------------------------------------|
| <input type="checkbox"/> | <input type="checkbox"/> | <input type="checkbox"/> | Do you do any physical exercise?                   |
| <input type="checkbox"/> | <input type="checkbox"/> | <input type="checkbox"/> | Do you drink alcohol?                              |
| <input type="checkbox"/> | <input type="checkbox"/> | <input type="checkbox"/> | Have you ever injected drugs (including steroids)? |

---
