# Supplementary material
Source: PubMed Central journal article supplement (PMC4382040)
Supplement: supp_3.1.E97_2014-0025_original_submission.pdf [file supp_3.1.E97_2014-0025_original_submission.pdf]

## Introduction

International studies indicate that inmates have higher rates of infectious diseases, chronic diseases, and psychiatric disorders relative to the general population.<sup>1-6</sup> Several factors could explain this finding. Inmates engage in more high-risk health behaviours such as intravenous drug use, tattooing, smoking, physical aggression, sexual activity with multiple partners, and alcohol abuse than members of the general population. Inmates' higher rates of brain injury also suggest a greater likelihood to be involved in activities that can result in physical injuries.<sup>7</sup> Other socio-economic factors known to be associated with poorer health are also more common among inmate populations, such as poverty, low educational attainment, substandard housing, and unemployment or underemployment.<sup>8-9</sup> In some cases, incarceration itself, with the increased exposure to individuals with higher rates of infection and continued risky behaviours while in correctional facilities, may contribute to generally poorer health status of inmates.

The Correctional Service of Canada (CSC) is responsible for all adult offenders receiving sentences of over two years. There is reason to be concerned that rates of chronic physical health conditions of federal inmates in Canada may be increasing because of demographic shifts in the incarcerated population. The proportion of older federal inmates has been increasing over the last twenty years; 21% of incarcerated federal inmates in 2011-12 were aged 50 years or older.<sup>10</sup> Older inmates generally require more health care services compared to younger inmates since they are more likely to suffer from chronic diseases and disabilities, and consequently have more specialised needs such as limitations in mobility and daily living.<sup>11-12</sup> Despite the increase in the proportion of inmates over the age of 50 years, the overall inmate population is younger than that

## Chronic Health Conditions in Male Federal Inmates

1  
2  
3 of the general Canadian population, based on the latest census which found that 15% of the  
4  
5 general population are 65 years and over<sup>13</sup>, compared to 3.5% in federal offenders.<sup>10</sup>  
6  
7

8 Another factor that could affect the overall prevalence of health conditions among federal  
9  
10 offenders is the increase in the proportion of the federally-sentenced population that is of self-  
11  
12 reported Aboriginal ancestry. Currently, Aboriginal inmates make up approximately 22% of the  
13  
14 CSC incarcerated population, an increase from 18% in 2002.<sup>10</sup> Overall, Aboriginal populations in  
15  
16 Canada face a higher prevalence of health conditions and a lower life expectancy.<sup>14-16</sup> Evidence  
17  
18 suggests that many of the health conditions such as diabetes, obesity, and drug and alcohol abuse  
19  
20 seen in the general population of Aboriginal Canadians are even more prevalent in Aboriginal  
21  
22 inmate populations.<sup>17</sup> Other areas that affect the relatively lower life expectancy of Aboriginal  
23  
24 offenders are the higher rates of youth suicide and injury from violence.<sup>23</sup>  
25  
26  
27  
28

29 Offender health status presents a challenge to those mandated to provide health services  
30  
31 incarcerated populations. Investment in this area, however, can reap dividends for both infectious  
32  
33 and chronic disease management. Identifying and treating offenders while they are in one  
34  
35 location, have access to testing and treatment, and can be monitored for adherence, could  
36  
37 improve the health outcomes for this high risk group, many of whom may have erratic contact  
38  
39 with health services when they are in the community.<sup>4</sup> It has been noted that treating offenders in  
40  
41 the criminal justice system is a public health opportunity to promote health in this vulnerable  
42  
43 population.<sup>18</sup>  
44  
45  
46  
47

48 Canada is a signatory to the United Nations Basic Principles for the Treatment of  
49  
50 Prisoners<sup>19</sup> that declares that all prisoners shall have access to the same health services available  
51  
52 in their country without discrimination on the grounds of their legal status. The *Corrections and*  
53  
54 *Conditional Release Act* legislates<sup>20</sup> CSC to deliver essential health care to Canadian federal  
55  
56  
57  
58  
59  
60

## Chronic Health Conditions in Male Federal Inmates

1  
2  
3 inmates. CSC policy requires that federal correctional institutions provide access to essential  
4  
5 medical, public health, dental, and mental health services, and specifies the requirement for  
6  
7 informed consent.  
8  
9

10 A comprehensive profile of the health needs of federal inmates in Canada was compiled  
11  
12 in 2004<sup>21</sup>, however, chronic disease estimates were tentative due to the significant limitations  
13  
14 from the lack of reliable data sources. The report's recommendation to examine inmates' health  
15  
16 data more systematically was the basis for the current study on the chronic health conditions of  
17  
18 incoming federal inmates.  
19  
20

### 21 22 **Methods**

#### 23 24 **Setting**

25  
26 We conducted a population-based descriptive study on the health status of newly-  
27  
28 admitted federal male inmates. The study examines prevalence of self-reported chronic  
29  
30 conditions for the incoming population and disaggregates the results by age (over and under 50  
31  
32 years) and by self-reported Aboriginal ancestry. Participants included all consecutive male  
33  
34 offenders admitted to CSC institutions who consented to a health assessment interview between  
35  
36 April 1, 2012 and September 30, 2012.  
37  
38  
39  
40  
41

#### 42 **Data sources**

43  
44 Within the first 24 hours of admission to CSC custody, all inmates are routinely seen by a  
45  
46 nurse to attend to immediate medical needs, explain the health assessment process and seek  
47  
48 informed consent for medical services. Within two weeks of admission, a comprehensive health  
49  
50 assessment questionnaire administered by a CSC nurse is offered to consenting inmates. An  
51  
52 inmate's responses are manually recorded along with the measurement of weight, height, and  
53  
54 vital signs and filed on the medical chart.  
55  
56  
57  
58  
59  
60

1  
2  
3  
4 Over a six-month period, data from all consecutive admissions across the five regions in  
5  
6 CSC were recorded in Microsoft Office Excel spreadsheets. The prevalence rates of chronic  
7  
8 health conditions and lifestyle risk factors were analysed for the newly-admitted federal inmate  
9  
10 population, and comparisons were made by Aboriginal ancestry and two age bands (i.e., under  
11  
12 and over 50 years), as well as to the general population of Canada. Given that a specific  
13  
14 population of male inmates was examined rather than a sampling, results were interpreted where  
15  
16 practical differences existed and insight into the magnitude of these differences was assessed  
17  
18 using effect sizes (i.e., Cramer's Phi; denoted  $\phi_c$ ). Cramer's Phi ranges from 0 to 1.0 and is  
19  
20 interpreted as such that values between .10 and .20 are considered to be a weak association,  
21  
22 values between 0.20 and 0.40 are a moderate association, values between .40 and .60 are a strong  
23  
24 association, and values above 0.60 indicate a very strong association.<sup>22</sup> Thus, when using a  
25  
26 population rather than a sample, as is the case in this study, the effect size allows for the  
27  
28 interpretation of the meaningfulness of existing differences.  
29  
30  
31  
32  
33  
34  
35  
36  
37  
38  
39  
40

## 41 42 43 44 45 46 47 48 49 50 51 52 53 54 55 56 57 58 59 60

### Results

Health data were collected from 2,273 offenders, representing 96% of the new admissions for male offenders over this period. The average age of participating offenders was 35.5 years ( $SD = 12.0$ ; Range = 18.2 – 82.4), and 21.9% ( $n = 496$ ) self-identified as being of Aboriginal ancestry. The average age of Aboriginal offenders was 32.8 years while the average age for non-Aboriginal offenders was 36.3 years.

The proportion of inmates with self-reported chronic health conditions compared to the general population of Canada is presented in Table 1. Over one-third of incoming offenders reported having sustained head injuries resulting in loss of consciousness. Back pain, asthma,

## Chronic Health Conditions in Male Federal Inmates

1  
2  
3 hepatitis C virus (HCV), hypertension, and arthritis were the other conditions most commonly  
4 reported. Lifestyle risk factors may contribute to some of these conditions (see Table 3). For  
5 instance, 53% of inmates reported drinking alcohol, 21% reported a history of injection drug use,  
6 and 65% were overweight or obese as measured by their body mass index (BMI).  
7  
8  
9  
10  
11  
12

13  
14 Insert Table 1  
15  
16

17 Table 2 presents the rates of self-reported chronic health conditions for male inmates  
18 younger than, and older than, age 50 years. This age analysis indicates that rates of many of the  
19 chronic health conditions were substantially higher in the group over 50 years, especially those  
20 affecting the cardiovascular system. Notably, there were meaningful differences whereby  
21 inmates over 50 years of age had higher rates of hypertension, high cholesterol, angina, arthritis,  
22 diabetes, prostate problems, and history of cancer than their younger counterparts.  
23  
24  
25  
26  
27  
28  
29  
30

31 Table 2 also presents the prevalence of chronic health conditions of newly-admitted  
32 inmates by self-reported Aboriginal ancestry. With the exception of head injury and hepatitis C  
33 virus being much higher among Aboriginal inmates than non-Aboriginal inmates, there were no  
34 meaningful differences in rates of chronic health conditions between Aboriginal and non-  
35 Aboriginal inmates. This unexpected result may be due in part to the higher proportion of  
36 Aboriginal inmates under the age of 50 years compared to the non-Aboriginal inmates (94.4%  
37 versus 84.6% respectively,  $\phi_c = .12$ ).  
38  
39  
40  
41  
42  
43  
44  
45  
46  
47

48 Lifestyle issues may contribute to Aboriginal inmates' higher rates of head injury and  
49 hepatitis C virus infection. Table 4 presents the prevalence of lifestyle risk factors that may be  
50 related to health outcomes by Aboriginal ancestry. Reported rates of alcohol use were higher in  
51 Aboriginal inmates than among non-Aboriginal inmates.  
52  
53  
54  
55  
56  
57  
58  
59  
60

1  
2  
3  
4  
5  
6  
7  
8  
9  
10  
11  
12  
13  
14  
15  
16  
17  
18  
19  
20  
21  
22  
23  
24  
25  
26  
27  
28  
29  
30  
31  
32  
33  
34  
35  
36  
37  
38  
39  
40  
41  
42  
43  
44  
45  
46  
47  
48  
49  
50  
51  
52  
53  
54  
55  
56  
57  
58  
59  
60

Insert Table 2

Insert Table 3

### Interpretation

Head injury, back pain, asthma, and hepatitis C virus were the most prevalent chronic health conditions reported by incoming federally-sentenced Canadian male inmates in 2012. Including head injury, the most common conditions affected the musculoskeletal system, with inmates frequently reporting back pain and arthritis. It is difficult to compare the inmates' rate of head injury to that of the general population since the prevalence of head injury is unknown in Canada, but is thought to disproportionately affect males aged 15- to 24-years-old.<sup>23</sup>

Compared to non-Aboriginal inmates, Aboriginal inmates had similar rates of many conditions but reported a hepatitis C virus infection prevalence rate twice that of non-Aboriginal inmates. Older inmates (over 50 years) reported generally higher rates of most physical health conditions than younger inmates. There were not strong differences, however, between older and younger inmates on the most frequently reported conditions (i.e., head injury, asthma, and hepatitis C virus). In the present study, the average age of Aboriginal inmates was younger and they had a lower representation among inmates aged 50 years and older than non-Aboriginal inmates, which is consistent with CSC admission data in 2011-2012.<sup>10</sup> This may explain why we did not find poorer health status between Aboriginal and non-Aboriginal newly-admitted inmates for many chronic conditions.

The rates of self-reported chronic health conditions in this Canadian federal inmate population do not appear to be higher than those reported for incarcerated offenders in most

## Chronic Health Conditions in Male Federal Inmates

1  
2  
3 other countries. Citing the Bureau of Justice Statistics, Fazel and Baillargeon<sup>1</sup> found that reported  
4 rates of HIV in jails and prisons in the United States (US) was around 1.5% and estimates of  
5  
6 rates of HIV in jails and prisons in the United States (US) was around 1.5% and estimates of  
7  
8 HCV prevalence from state prison systems in the US ranged from 23% to 34%. Reported rates of  
9  
10 hypertension and asthma are higher in the US prisons than in this Canadian inmate population,  
11  
12 and rates of diabetes appear to be comparable. An inmate survey among Australian inmates in  
13  
14 New South Wales prisons using a similar methodology found much higher rates of self-reported  
15  
16 health conditions than in our Canadian inmate population.<sup>3</sup> Rates of most chronic conditions,  
17  
18 with the exception of asthma and blood-borne viruses, are not more prevalent among federal  
19  
20 male offenders than among the adult Canadian male population according to the 2011 Canadian  
21  
22 Community Health Survey (CCHS)<sup>24</sup>; indeed, rates for hypertension and arthritis are lower.  
23  
24  
25  
26

27 The majority of incoming inmates participated in the medical assessment at intake in this  
28  
29 6-month period in 2012, so our estimates of self-reported chronic health conditions are likely to  
30  
31 be representative of the newly-incarcerated federal population. Further research could clarify the  
32  
33 extent to which chronic health conditions among inmates are linked to lifestyle factors and,  
34  
35 therefore, may be expected to be higher in certain subpopulations of offenders. For example,  
36  
37 further analysis points to elevated rates of head injury and HIV and HCV infection among male  
38  
39 offenders who report histories of injection drug use (data not shown). Aboriginal inmates report  
40  
41 higher rates of substance abuse, particularly injection drug use, and their rates of head injury and  
42  
43 blood-borne viruses are also higher. It should be noted that the presence of chronic health  
44  
45 conditions for specific groups of Aboriginal inmates may differ; this study did not disaggregate  
46  
47 Aboriginal inmates by First Nations, Métis, or Inuit ancestry. Based on recent Statistics Canada  
48  
49 reports compiling the results of the CCHS<sup>15,24</sup>, there is evidence that the higher rates of diabetes  
50  
51 relative to the general Canadian population applies to First Nations people, less so to the  
52  
53  
54  
55  
56  
57  
58  
59  
60

1  
2  
3 Métis.<sup>15,16</sup>  
4  
5

### 6 **Limitations**

7  
8 A limitation of the present study is that height and weight were the only objectively  
9 measured health indicators; all other data were provided through the inmates' self-report. This is  
10 the same methodology that the CCHS Household Questionnaire component has used to collect  
11 its data on the Canadian population. However, incarcerated populations are known to under-  
12 utilize health services in the community<sup>4</sup>; some chronic health conditions may not be known to  
13 the individual until they are diagnosed while in prison (e.g., hypertension). Incoming inmates are  
14 younger on average than those who are already incarcerated; therefore rates of self-reported  
15 chronic health conditions based on their responses could under-estimate the prevalence among  
16 the total incarcerated population. The most frequently reported chronic health condition (i.e.,  
17 head injury) is difficult to compare to the general population due to a surveillance gap in  
18 Canada.<sup>25</sup>  
19  
20  
21  
22  
23  
24  
25  
26  
27  
28  
29  
30  
31  
32  
33

34 A substantial percentage of Canadian inmates also reported having a blood-borne virus,  
35 but it is unknown whether the self-reported rates represent reliable estimates of the true  
36 prevalence of HIV and HCV infections on admission. CSC offers HIV and HCV screening and  
37 testing to all consenting inmates at intake and upon request throughout incarceration. The latest  
38 CSC infectious disease surveillance report for the 2007-2008 period reported a 58% uptake of  
39 testing for HIV at intake and found that 1.7% of these inmates were laboratory-confirmed  
40 positive.<sup>26</sup> It is not clear, however, whether those who agreed to the testing are representative of  
41 the newly-admitted population, and therefore, it cannot be determined whether self-report data  
42 over- or under-estimate the true prevalence of blood-borne viruses. It should be noted that, both a  
43 previous CSC inmate survey<sup>27</sup>, as well as routine infectious disease surveillance data, concur that  
44  
45  
46  
47  
48  
49  
50  
51  
52  
53  
54  
55  
56  
57  
58  
59  
60



## Chronic Health Conditions in Male Federal Inmates

1  
2  
3 virtually all inmates were infected prior to their current incarceration.<sup>28</sup>  
4  
5

**Conclusion**  
6  
7

8 This study provides the first systematic estimate of the prevalence of chronic health  
9 conditions among incoming federal inmates in Canada. Newly-admitted federal inmates reported  
10 engaging in lifestyle risk factors such as drinking and injection drug use at rates higher than  
11 reported for the Canadian public<sup>29</sup>, but with the exceptions of HCV, back pain and asthma, the  
12 prevalence of many chronic conditions were similar to or less than that of men in the Canadian  
13 general population. Furthermore, the rates of most conditions are lower than those reported in  
14 American and Australian prison populations. Some inmate subgroups may require a higher  
15 concentration of health service resources (e.g., Aboriginal, older inmates, and those with a  
16 history of intravenous drug use). The research provides a benchmark from which trends in  
17 prevalence of chronic health conditions in Canada's penitentiaries can be monitored over time,  
18 and thus help to inform the design of primary and preventative health programs. CSC continues  
19 to address infectious diseases by education, harm reduction policies, and offering testing and  
20 treatment to infected inmates. Correctional programs are designed to reduce injection drug and  
21 alcohol abuse and are proven to reduce criminal recidivism for a diverse range of offenders.<sup>30</sup>  
22 Future research should investigate whether these programs also have a beneficial effect in  
23 reducing related chronic health conditions among federal offenders.  
24  
25  
26  
27  
28  
29  
30  
31  
32  
33  
34  
35  
36  
37  
38  
39  
40  
41  
42  
43  
44  
45  
46  
47  
48  
49  
50  
51  
52  
53  
54  
55  
56  
57  
58  
59  
60

**References**

1. Fazel S, Baillargeon J. The health of prisoners. *Lancet* 2011;377(9769):956–65.
2. Harris F, Hek G, Condon L. Health needs of prisoners in England and Wales: The implications for prison healthcare of gender, age and ethnicity. *Health Soc Care Comm* 2007;15:56-66.
3. Indig D, Topp L, Ross B, Mamoon H, Border B, Kumar S, McNamara M. 2009 NSW Inmate Health Survey: Key findings report. Sydney: Justice Health; 2010. Available at: <http://www.justicehealth.nsw.gov.au/about-us/publications/2009-ih-s-report.pdf> (Accessed on February 11, 2014).
4. National Commission on Correctional Health Care. The health status of soon-to-be-released inmates: A report to Congress (Volume 1). Chicago (IL); 2004. 105p. Document No.: 189735. Available at: <http://www.ncjrs.gov/pdffiles1/nij/grants/189735.pdf> (Accessed on February 11, 2014).
5. Robert D. Understanding health care utilization in custody: Situation of Canadian penitentiaries. *J Correct Health Care*, 2004;10:239-256.
6. Wilper AP, Woolhandler S, Boyd JW, Lasser KE, McCormick D, Bor, DH, Himmelstein DU. The health and health care of US prisoners: Results of a nationwide survey. *Am J Public Health* 2009;99:666–672.
7. Harmon K. (2012, February). Brain injury rate 7 times greater among U.S. prisoners. *Sci Am*. Available at: <http://www.scientificamerican.com/article.cfm?id=traumatic-brain-injury-prison>. (Accessed on February 11, 2014).
8. Public Health Agency of Canada. What makes Canadians healthy or unhealthy? 2003. Available at: <http://www.phac-aspc.gc.ca/ph-sp/determinants/determinants-eng.php> (Accessed on February 11, 2014).

## Chronic Health Conditions in Male Federal Inmates

- 1  
2  
3  
4  
5  
6  
7  
8  
9  
10  
11  
12  
13  
14  
15  
16  
17  
18  
19  
20  
21  
22  
23  
24  
25  
26  
27  
28  
29  
30  
31  
32  
33  
34  
35  
36  
37  
38  
39  
40  
41  
42  
43  
44  
45  
46  
47  
48  
49  
50  
51  
52  
53  
54  
55  
56  
57  
58  
59  
60
9. World Health Organization. Social determinants of health: The solid facts. 2nd ed. Denmark: World Health Organization; 2003. Available at: [http://www.euro.who.int/\\_\\_data/assets/pdf\\_file/0005/98438/e81384.pdf](http://www.euro.who.int/__data/assets/pdf_file/0005/98438/e81384.pdf) (Accessed on February 11, 2014).
10. Statistics Canada. Population data 2011 census. Retrieved from <http://www12.statcan.gc.ca/census-recensement/2011/as-sa/98-310-x/98-310-x2011001-eng.cfm>. (Accessed on February 11, 2014).
11. Aday RH, Krabill JJ. Special needs offenders in correctional institutions. Chapter 7, Older and geriatric offenders: Critical issues for the 21st century. Gideon, L. editor, Thousand Oaks, CA: Sage Inc.;2013. p. 203-232.
12. Potter E, Cashin AJ, Chenoweth L, Jeon YH. The healthcare of older inmates in the correctional setting. *Int J Prisoner Health* 2007;3:204-213.
13. Statistics Canada. Population data 2011 census. 2011. Available at: <http://www12.statcan.gc.ca/census-recensement/2011/as-sa/98-310-x/98-310-x2011001-eng.cfm>. (Accessed on February 11, 2014).
14. King M. Chronic diseases and mortality in Canadian Aboriginal peoples: Learning from the knowledge. *Chronic Diseases in Canada* 2010; 31:2-3.
15. Gionet L, Roshanafshar S. Health at a glance: Select health indicators of First Nations people living off reserve, Métis and Inuit. *Statistics Canada Catalogue* no. 82-624-X. 2013. Available at: <http://www.statcan.gc.ca/pub/82-624-x/2013001/article/11763-eng.htm> (Accessed on February 11, 2014).
16. Gracey M, King M. Indigenous health Part 1: Determinants and disease patterns. *Lancet* 2009; 374(9683):65-75.

- 1  
2  
3 17. Bell A, Crutcher N. Health issues for Aboriginal offenders. *Forum on Correctional Research*  
4  
5 2002;14:20-23.  
6  
7  
8 18. Herbert K, Plugge E, Foster C, Doll H. Prevalence of risk factors for non-communicable  
9  
10 diseases in prison populations worldwide: A systematic review. *Lancet* 2012;379(9830):1975-  
11  
12 1982.  
13  
14  
15 19. United Nations. Basic Principles for the Treatment of Prisoners; General Assembly  
16  
17 resolution 45/111. New York: United Nations. 1990. Available at:  
18  
19 <http://www.ohchr.org/EN/ProfessionalInterest/Pages/BasicPrinciplesTreatmentOfPrisoners.aspx>  
20  
21 (Accessed on February 11, 2014).  
22  
23  
24 20. *Corrections and Conditional Release Act* (S.C. 1992, c. 20).  
25  
26  
27 21. Correctional Service Canada. A health care needs assessment of federal inmates in Canada.  
28  
29 *Can J Public Health* 2004;95(supplement 1):1-68.  
30  
31  
32 22. Rea LM, Parker, RA. Designing and conducting survey research. San Francisco: Jossey-  
33  
34 Bass. 1992.  
35  
36  
37 23. Pickett W, Ardern C, Brison RJ. A population-based study of potential brain injuries  
38  
39 requiring emergency care. *CMAJ* 2001;165:288-292.  
40  
41  
42 24. Statistics Canada. Data from the Canadian Community Health Survey. 2013. Available at:  
43  
44 [http://www5.statcan.gc.ca/cansim/a26?lang=eng&retrLang=eng&id=1050513&paSer=&pattern](http://www5.statcan.gc.ca/cansim/a26?lang=eng&retrLang=eng&id=1050513&paSer=&pattern=&stByVal=1&p1=1&p2=31&tabMode=dataTable&csid=)  
45  
46 [=&stByVal=1&p1=1&p2=31&tabMode=dataTable&csid=](http://www5.statcan.gc.ca/cansim/a26?lang=eng&retrLang=eng&id=1050513&paSer=&pattern=&stByVal=1&p1=1&p2=31&tabMode=dataTable&csid=) (Accessed on February 11, 2014).  
47  
48  
49 25. Canadian Institute for Health Information. The burden of neurological diseases,  
50  
51 disorders and injuries in Canada. Ottawa (ON): CIHI; 2007. Available at:  
52  
53 [http://www.cpa.ca/cpaproject/userfiles/Documents/Practice\\_Page/Burden\\_neuro\\_diseases\\_en.pdf](http://www.cpa.ca/cpaproject/userfiles/Documents/Practice_Page/Burden_neuro_diseases_en.pdf).  
54  
55 (Accessed on February 11, 2014).  
56  
57  
58  
59  
60

## Chronic Health Conditions in Male Federal Inmates

- 1  
2  
3  
4  
5  
6 26. Correctional Service of Canada. Infectious disease surveillance in Canadian federal  
7  
8 penitentiaries: 2007-2008 pre-release report. Ottawa (ON): Health Services Sector, Correctional  
9  
10 Service Canada; 2008. Available at: [http://www.csc-scc.gc.ca/text/pblct/infdsfp-2007-08/index-](http://www.csc-scc.gc.ca/text/pblct/infdsfp-2007-08/index-eng.shtml)  
11  
12 [eng.shtml](http://www.csc-scc.gc.ca/text/pblct/infdsfp-2007-08/index-eng.shtml) (Accessed on February 11, 2014).  
13  
14
- 15 27. Zakaria, D., Thompson, J., Jarvis, A., & Borgatta, F. Summary of emerging findings from the  
16  
17 2007 National Inmate Infectious Diseases and Risk-behaviours Survey. Ottawa (ON):  
18  
19 Correctional Service of Canada; 2010. Available at: [http://www.csc-](http://www.csc-scc.gc.ca/005/008/092/005008-0211-eng.pdf)  
20  
21 [scc.gc.ca/005/008/092/005008-0211-eng.pdf](http://www.csc-scc.gc.ca/005/008/092/005008-0211-eng.pdf) (Accessed on February 11, 2014).  
22  
23
- 24 28. Zakaria D, Thompson JM, Borgatta F. Rates of reported sexually transmitted infections since  
25  
26 admission to Canadian federal prison and associated incarceration characteristics and sexual risk-  
27  
28 behaviours. Ottawa (ON): Correctional Service of Canada; 2010. Report No.:196. Available at:  
29  
30 <http://www.csc-scc.gc.ca/research/r196-eng.shtml> (Accessed on February 11, 2014).  
31  
32  
33
- 34 29. Canadian Centre for Substance Abuse. Injection drug users overview. Available at:  
35  
36 <http://www.ccsa.ca/Eng/Topics/Populations/IDU/Pages/InjectionDrugUsersOverview.aspx>  
37  
38 (Accessed on February 11, 2014).  
39  
40
- 41 30. Usher A, & Stewart LA. The effectiveness of correctional programs with diverse offenders:  
42  
43 A meta-analytic study. *Int. J. Offender Ther. Comp Criminol* 2014;58(2):209-230.  
44  
45  
46  
47  
48  
49  
50  
51  
52  
53  
54  
55  
56  
57  
58  
59  
60

Table 1

*Self-reported Chronic Health Conditions among Newly-admitted Federal Male Inmates (2012)  
and the Canadian Male Population*

| Health Condition         | Newly-admitted Federal Male Inmates |          |
|--------------------------|-------------------------------------|----------|
|                          | %                                   | <i>n</i> |
| Any health condition     | 46.7                                | 1,062    |
| Central nervous system   |                                     |          |
| Head injury              | 34.1                                | 738      |
| Seizures                 | 4.3                                 | 92       |
| Spinal injury            | 2.6                                 | 56       |
| Musculoskeletal system   |                                     |          |
| Back pain                | 19.3                                | 411      |
| Arthritis                | 8.3                                 | 177      |
| Osteoporosis             | 0.4                                 | 9        |
| Respiratory system       |                                     |          |
| Asthma                   | 14.7                                | 318      |
| Bronchitis               | 2.9                                 | 63       |
| Other pulmonary disease  | 1.8                                 | 38       |
| Cardiovascular system    |                                     |          |
| Hypertension             | 8.5                                 | 184      |
| High cholesterol         | 5.3                                 | 114      |
| Heart attack             | 2.0                                 | 44       |
| Arrhythmia               | 1.6                                 | 34       |
| Angina                   | 1.4                                 | 30       |
| Stroke                   | 0.7                                 | 16       |
| Blood-borne viruses      |                                     |          |
| HIV/AIDS <sup>†</sup>    | 1.3                                 | 27       |
| Hepatitis C              | 9.4                                 | 191      |
| Endocrine system         |                                     |          |
| Diabetes                 | 4.2                                 | 88       |
| Gastro intestinal system |                                     |          |
| Ulcers                   | 3.2                                 | 69       |
| Reproductive system      |                                     |          |
| Prostate problems        | 2.8                                 | 60       |
| Any cancer history       | 1.8                                 | 39       |

Note: N varies by conditions due to missing data.

<sup>†</sup> HIV/AIDS = human immunodeficiency virus / acquired immunodeficiency syndrome.

## Chronic Health Conditions in Male Federal Inmates

Table 2  
*Chronic Health Conditions among Federal Male Offenders by Age Group and Aboriginal Ancestry*

| Health Condition         | Age Group                |     |                        |    |            | Aboriginal Ancestry     |     |                               |     |            |
|--------------------------|--------------------------|-----|------------------------|----|------------|-------------------------|-----|-------------------------------|-----|------------|
|                          | <50 years<br>(n = 1,970) |     | 50+ years<br>(n = 302) |    | $\phi_c$   | Aboriginal<br>(n = 496) |     | Non-Aboriginal<br>(n = 1,774) |     | $\phi_c$   |
|                          | %                        | n   | %                      | n  |            | %                       | n   | %                             | n   |            |
| Central nervous system   |                          |     |                        |    |            |                         |     |                               |     |            |
| Head injury              | 34.6                     | 648 | 30.7                   | 90 | .03        | 43.0                    | 193 | 31.7                          | 543 | <b>.10</b> |
| Seizures                 | 4.0                      | 75  | 5.8                    | 17 | .03        | 5.1                     | 23  | 4.0                           | 68  | .02        |
| Spinal injury            | 2.5                      | 47  | 3.1                    | 9  | .01        | 2.9                     | 13  | 2.5                           | 43  | .01        |
| Musculoskeletal system   |                          |     |                        |    |            |                         |     |                               |     |            |
| Arthritis                | 6.6                      | 122 | 19.2                   | 55 | <b>.16</b> | 8.1                     | 36  | 8.3                           | 140 | .003       |
| Osteoporosis             | 0.3                      | 6   | 1.1                    | 3  | .04        | 0.5                     | 2   | 0.4                           | 7   | .002       |
| Back pain                | 18.0                     | 332 | 27.5                   | 79 | .08        | 16.4                    | 73  | 20.0                          | 338 | .04        |
| Respiratory system       |                          |     |                        |    |            |                         |     |                               |     |            |
| Asthma                   | 15.1                     | 284 | 11.6                   | 34 | .03        | 12.7                    | 57  | 15.2                          | 261 | .03        |
| Bronchitis               | 2.9                      | 55  | 2.7                    | 8  | .004       | 3.1                     | 14  | 2.9                           | 49  | .01        |
| Other pulmonary disease  | 1.2                      | 23  | 5.1                    | 15 | <b>.10</b> | 0.7                     | 3   | 2.0                           | 35  | .04        |
| Cardiovascular system    |                          |     |                        |    |            |                         |     |                               |     |            |
| Hypertension             | 6.1                      | 114 | 23.8                   | 70 | <b>.22</b> | 7.8                     | 35  | 8.7                           | 149 | .01        |
| Heart attack             | 1.3                      | 24  | 6.8                    | 20 | <b>.13</b> | 2.0                     | 9   | 2.0                           | 35  | .001       |
| High cholesterol         | 3.4                      | 64  | 17.1                   | 50 | <b>.21</b> | 2.4                     | 11  | 6.0                           | 103 | .06        |
| Angina                   | 0.6                      | 12  | 6.1                    | 18 | <b>.16</b> | 1.1                     | 5   | 1.5                           | 25  | .01        |
| Stroke                   | 0.4                      | 8   | 2.7                    | 8  | .09        | 0.4                     | 2   | 0.8                           | 14  | .02        |
| Arrhythmia               | 1.4                      | 26  | 2.7                    | 8  | .04        | 1.3                     | 6   | 1.6                           | 28  | .01        |
| Blood-borne virus        |                          |     |                        |    |            |                         |     |                               |     |            |
| HIV/AIDS <sup>†</sup>    | 1.3                      | 23  | 1.5                    | 4  | .005       | 2.4                     | 10  | 1.1                           | 17  | .05        |
| Hepatitis C              | 8.8                      | 156 | 12.7                   | 35 | .05        | 15.5                    | 66  | 7.7                           | 124 | <b>.11</b> |
| Endocrine system         |                          |     |                        |    |            |                         |     |                               |     |            |
| Diabetes                 | 2.9                      | 54  | 11.9                   | 34 | <b>.15</b> | 3.6                     | 16  | 4.3                           | 72  | .01        |
| Gastro intestinal system |                          |     |                        |    |            |                         |     |                               |     |            |
| Ulcers                   | 3.0                      | 56  | 4.4                    | 13 | .03        | 2.7                     | 12  | 3.3                           | 57  | .02        |
| Reproductive system      |                          |     |                        |    |            |                         |     |                               |     |            |
| Prostate problems        | 1.4                      | 26  | 11.8                   | 34 | <b>.21</b> | 2.5                     | 11  | 2.9                           | 49  | .01        |
| Any cancer history       | 1.0                      | 19  | 6.8                    | 20 | <b>.15</b> | 0.9                     | 4   | 2.0                           | 35  | .04        |

Note: N varies by conditions due to missing data. Numbers that are bolded represent meaningful effect sizes for interpretation.

\*BMI = Body Mass Index. <sup>†</sup>HIV/AIDS = human immunodeficiency virus / acquired immunodeficiency syndrome.

Table 3

*Lifestyle Risk Factors Related to Health Outcomes for Newly-admitted Federal Male Offenders, Overall and by Aboriginal Ancestry, (2012)*

| Lifestyle Risk Factor                          | Total<br>( <i>N</i> = 2,273) |          | Aboriginal<br>( <i>n</i> = 496) |          | Non-Aboriginal<br>( <i>n</i> = 1,774) |          | $\phi_c$   |
|------------------------------------------------|------------------------------|----------|---------------------------------|----------|---------------------------------------|----------|------------|
|                                                | %                            | <i>n</i> | %                               | <i>n</i> | %                                     | <i>n</i> |            |
| Drinks alcohol                                 | 52.6                         | 1,049    | 62.1                            | 257      | 49.8                                  | 786      | <b>.10</b> |
| Ever inject drugs                              | 20.8                         | 415      | 27.6                            | 114      | 18.9                                  | 299      | .09        |
| Cigarette smoker                               | 21.1                         | 453      | 19.7                            | 89       | 21.5                                  | 364      | .02        |
| No physical exercise                           | 21.1                         | 407      | 15.1                            | 61       | 22.7                                  | 346      | .08        |
| Overweight (BMI* 25 – 29.9) or obese (BMI 30+) | 64.5                         | 1,164    | 67.9                            | 243      | 63.6                                  | 919      | .04        |

*Note:* *N* varies by conditions due to missing data. Numbers that are bolded represent meaningful effect sizes for interpretation (i.e., at least a weak association).

\*BMI = Body Mass Index.
